# Supplementary material for: Alpha-linolenic acid modulates systemic and adipose tissue-specific insulin sensitivity, inflammation, and the endocannabinoid system in dairy cows
Source: PubMed Central journal article supplement (PMC10066235; doi:10.1038/s41598-023-32433-7), 2023-03-31

Adipose tissue

CTL ALA  
3882 3785 4001 3798 3940 3991 3986 3745

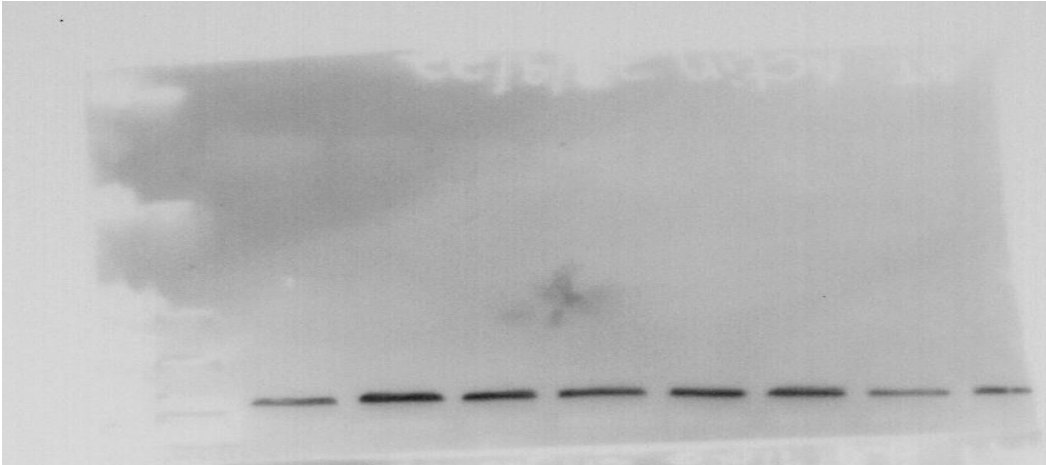

Actin (45 KDa) →

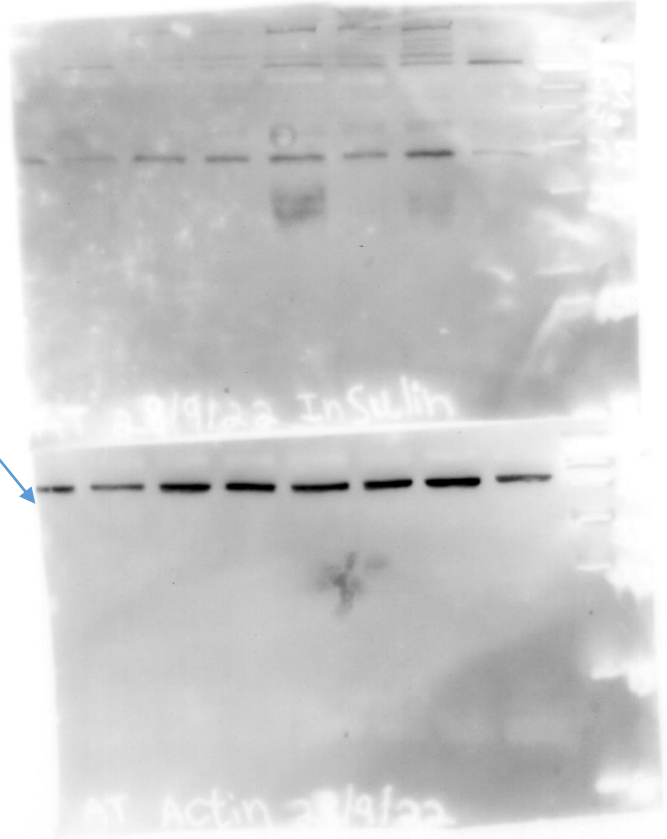

IR $\beta$  (95 KDa)

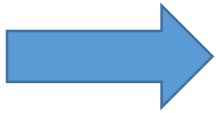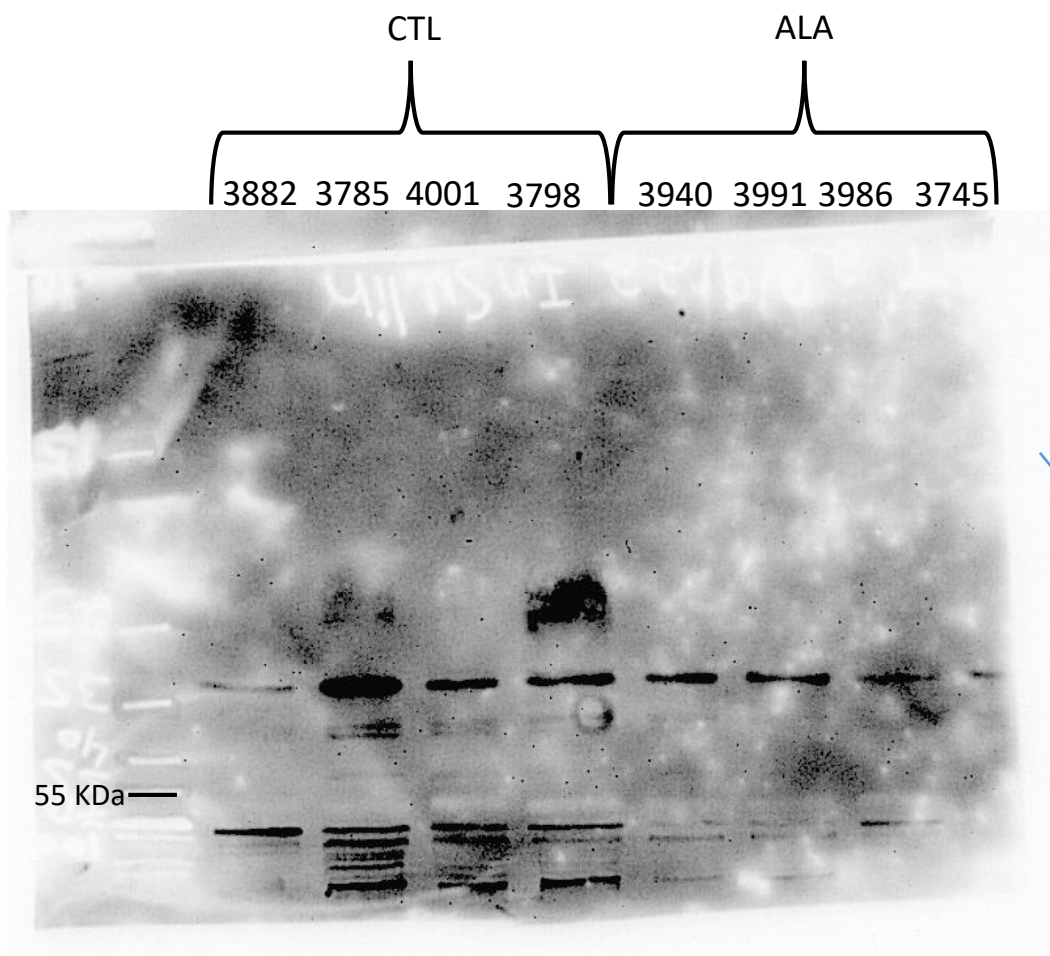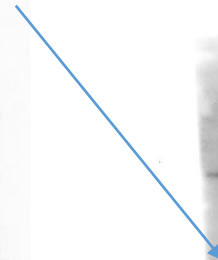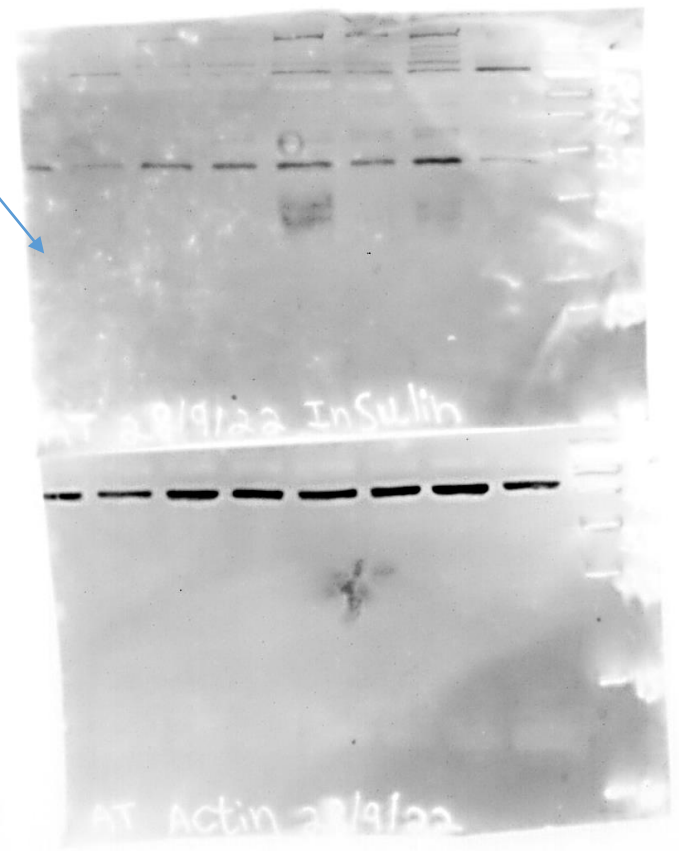

CTL

ALA

3882 3785 4001 3669 3798 3987 3728 | 3805 3924 3940 3991 3986 3745 3652

AKT (60 KDa)

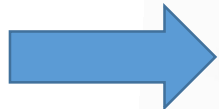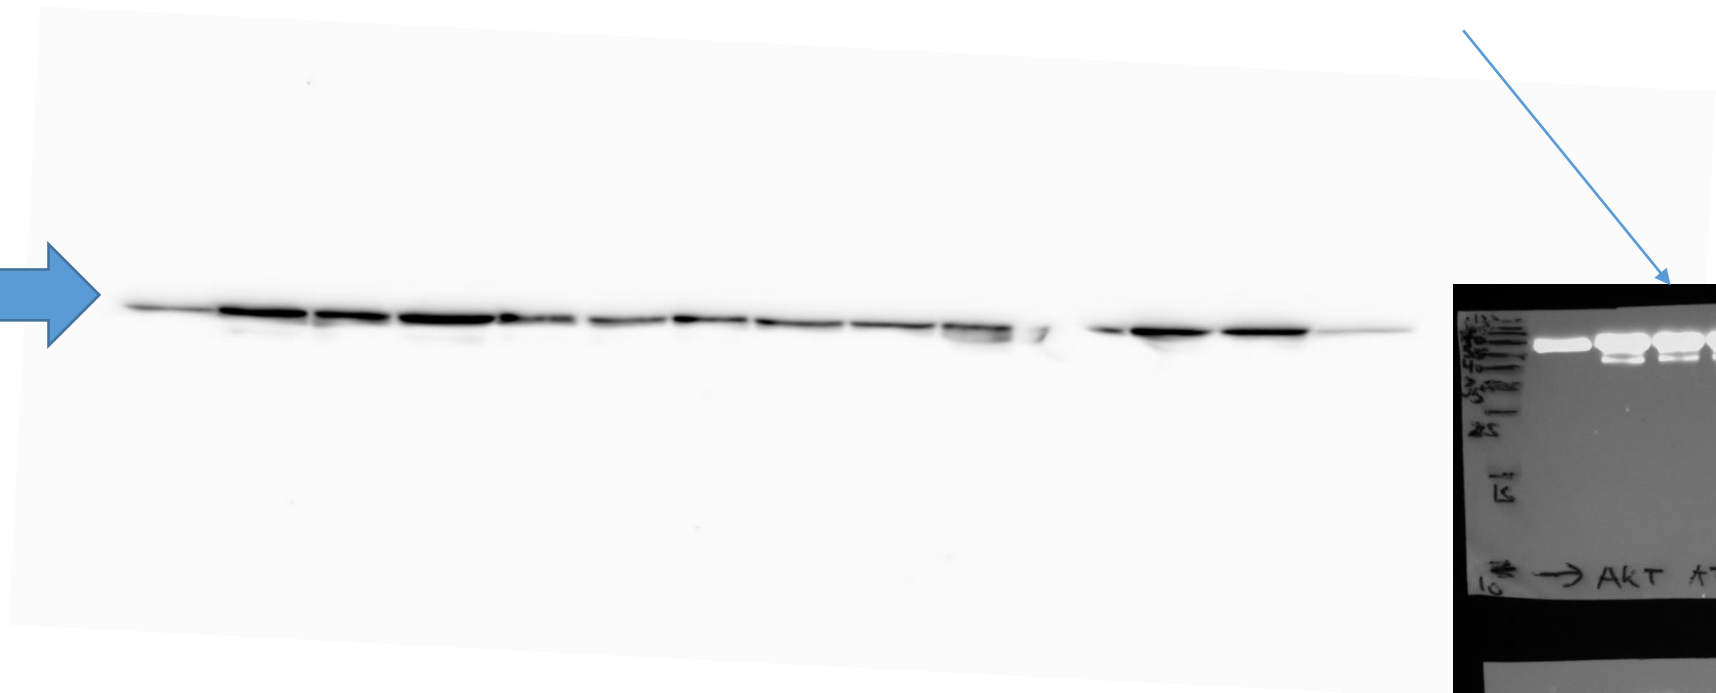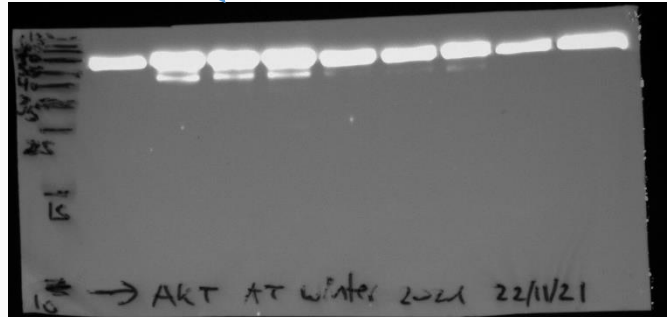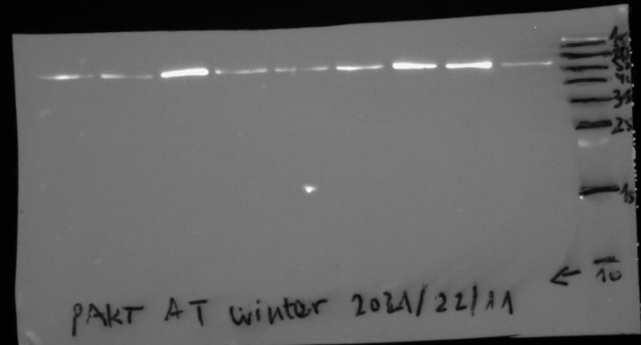

CTL

ALA

3882 3785 4001 3669 3798 3987 3728 | 3805 3924 3940 3991 3986 3745 3652

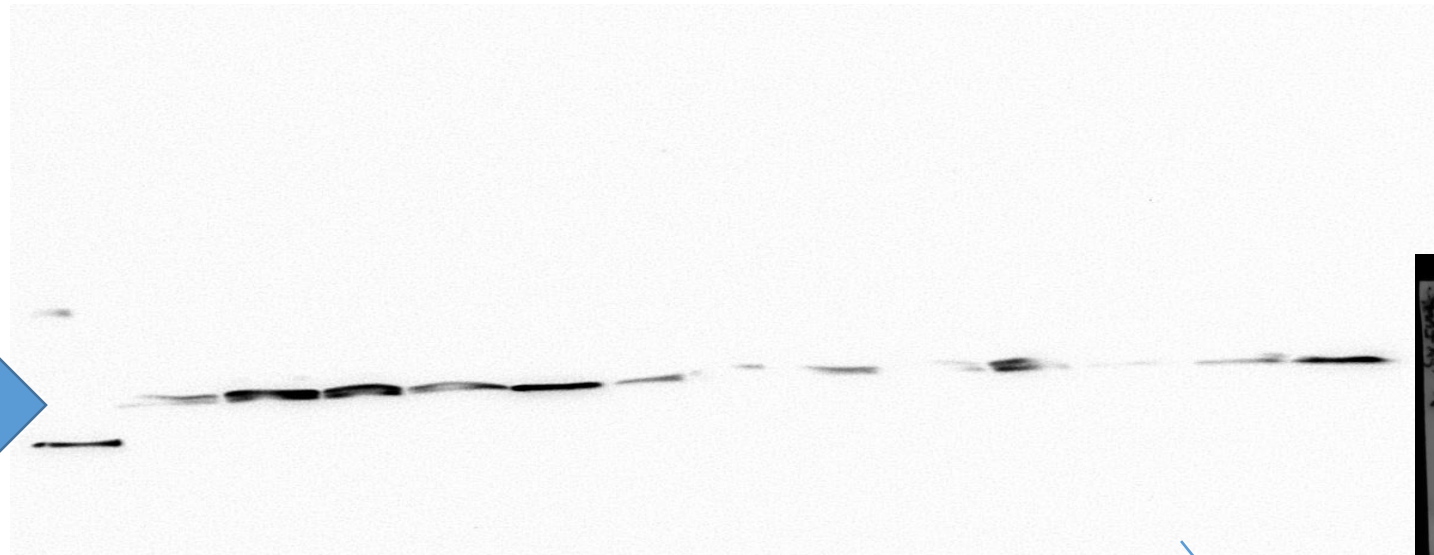

pAKT (60 KDa)

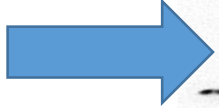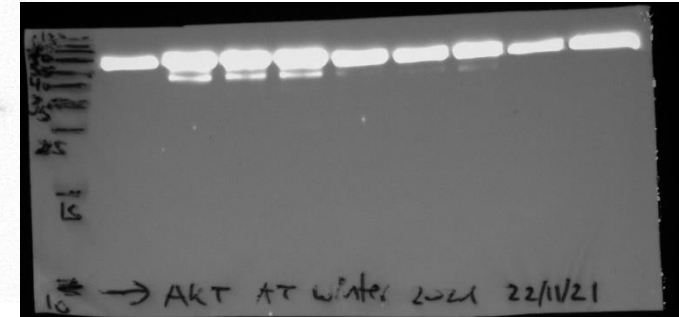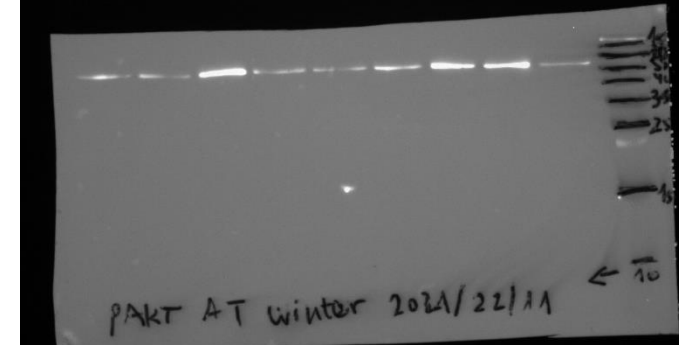

Supplement: 41598_2023_32433_MOESM1_ESM.pdf [file 41598_2023_32433_MOESM1_ESM.pdf]
