# Supplementary material for: Alpha-linolenic acid modulates systemic and adipose tissue-specific insulin sensitivity, inflammation, and the endocannabinoid system in dairy cows
Source: PubMed Central journal article supplement (PMC10066235; doi:10.1038/s41598-023-32433-7), 2023-03-31

PBMC

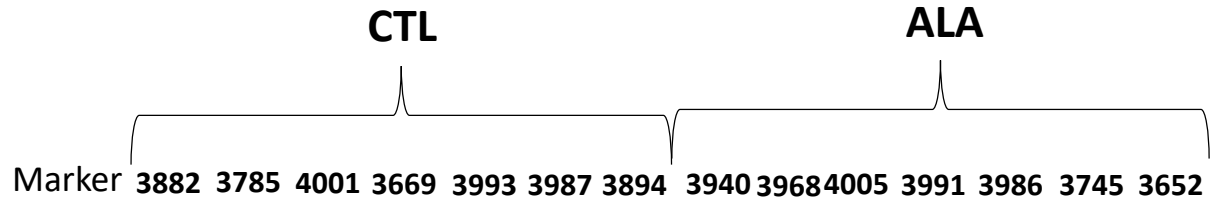

Actin (45 KDa)

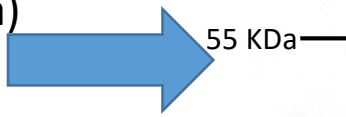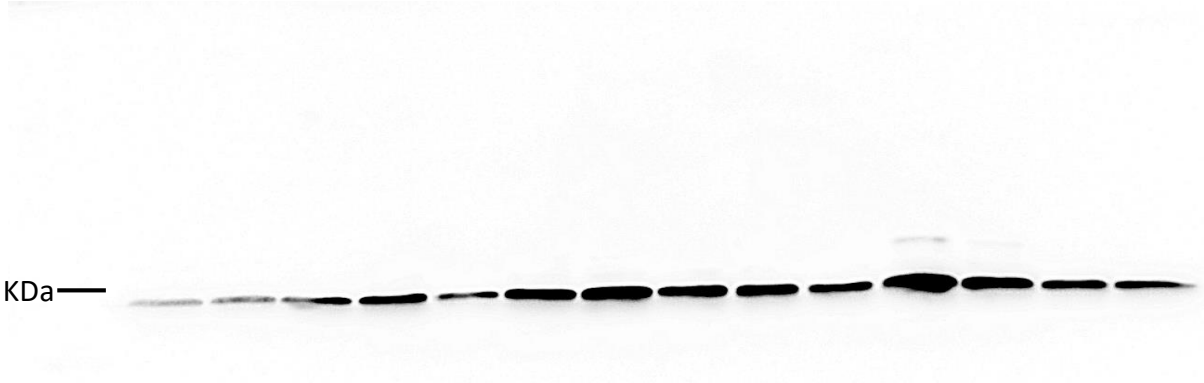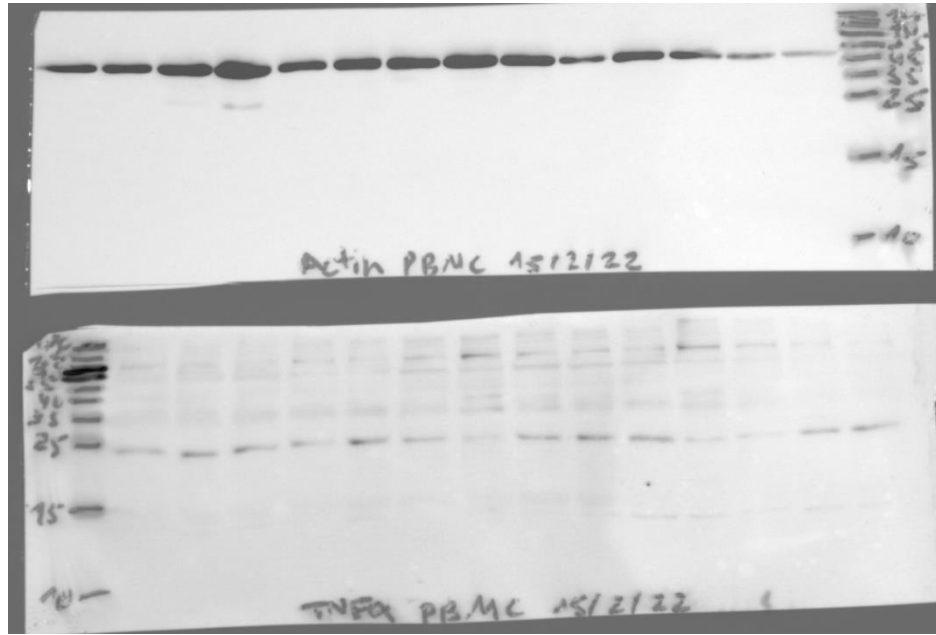

PBMC

CTL

ALA

Marker 3882 3785 4001 3669 3993 3987 3894 3940 3968 4005 3991 3986 3745 3652

CB1 (60 KDa)

55 KDa

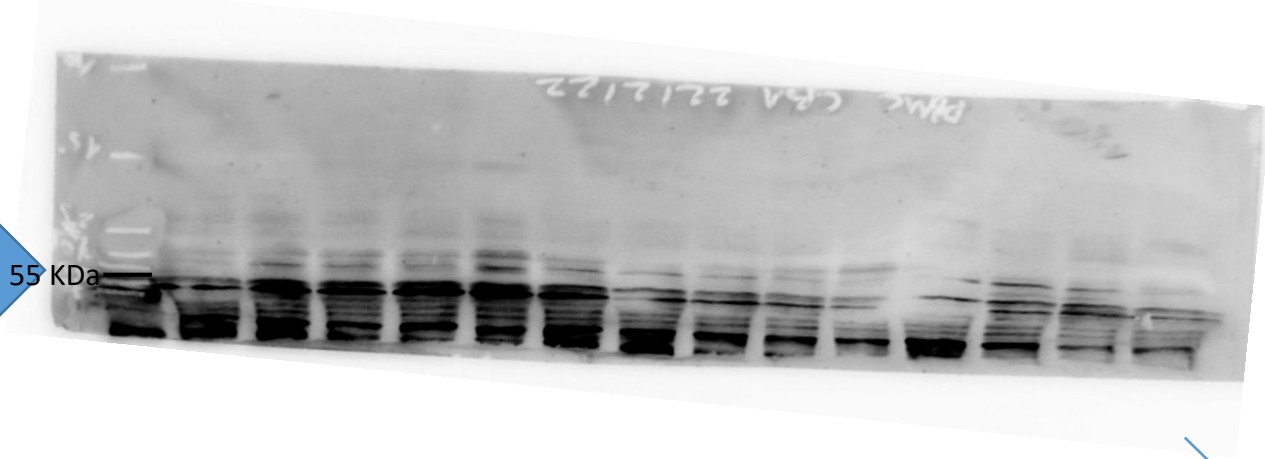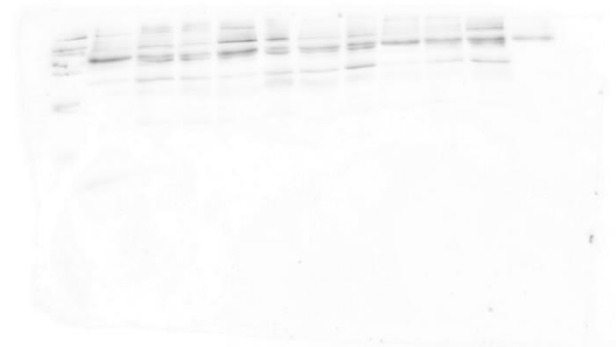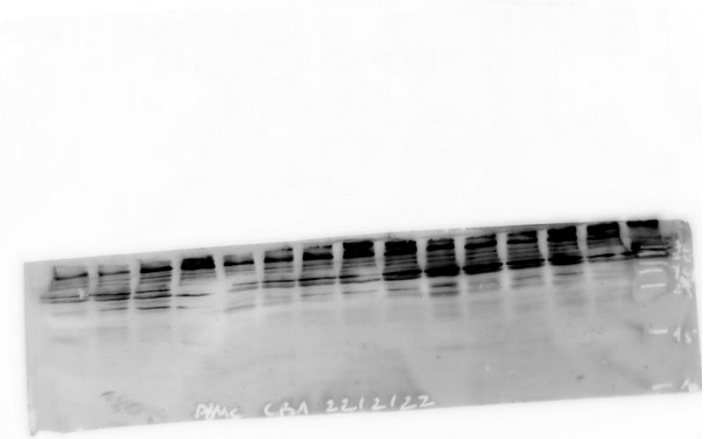

PBMC

CTL

ALA

Marker 3882 3785 4001 3669 3993 3987 3894 3940 3968 4005 3991 3986 3745 3652

MGLL (35 KDa)

25 KDa

55 KDa

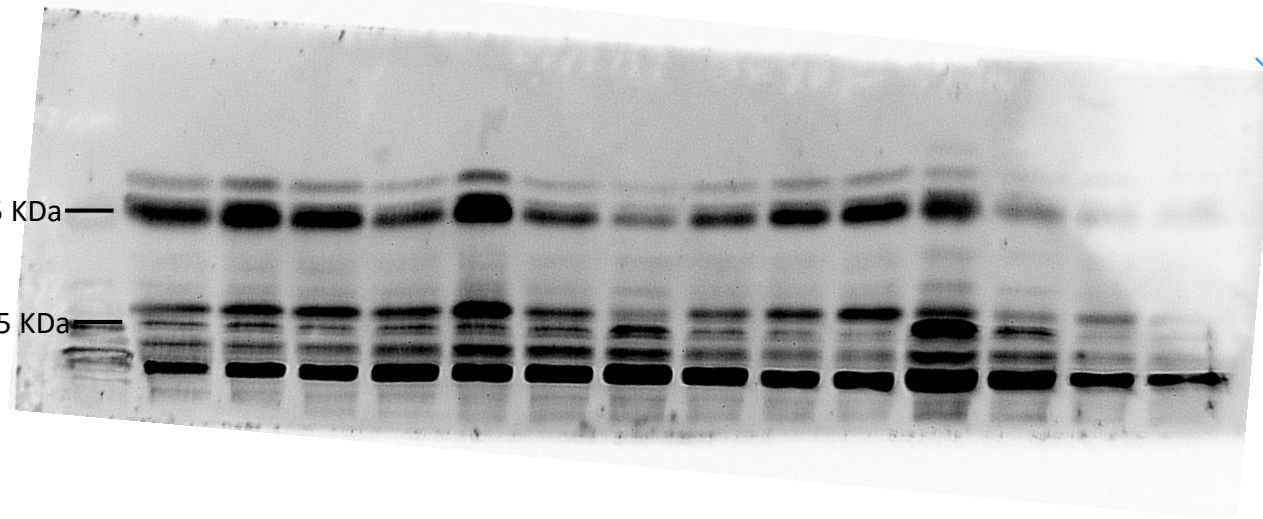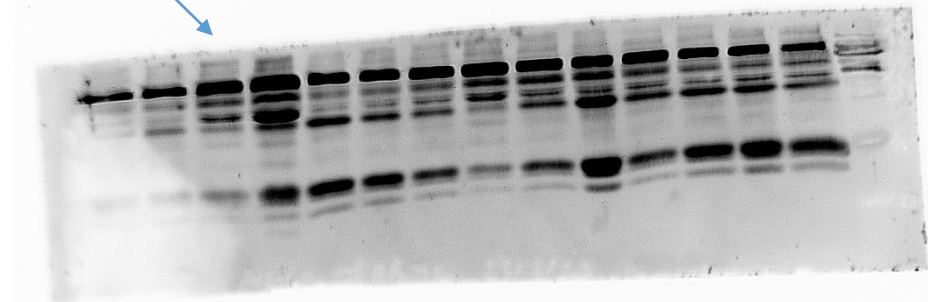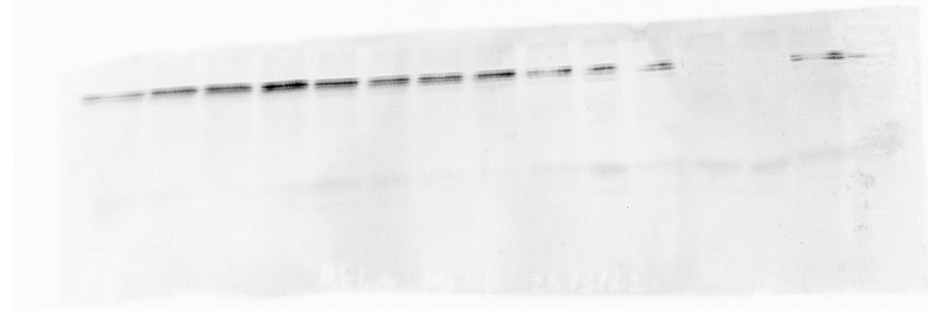

PBMC

CTL

ALA

Marker 3882 3785 4001 3669 3993 3987 3894 3940 3968 4005 3991 3986 3745 3652

TNF-A (60 KDa)

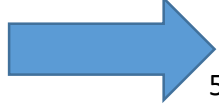

55 KDa

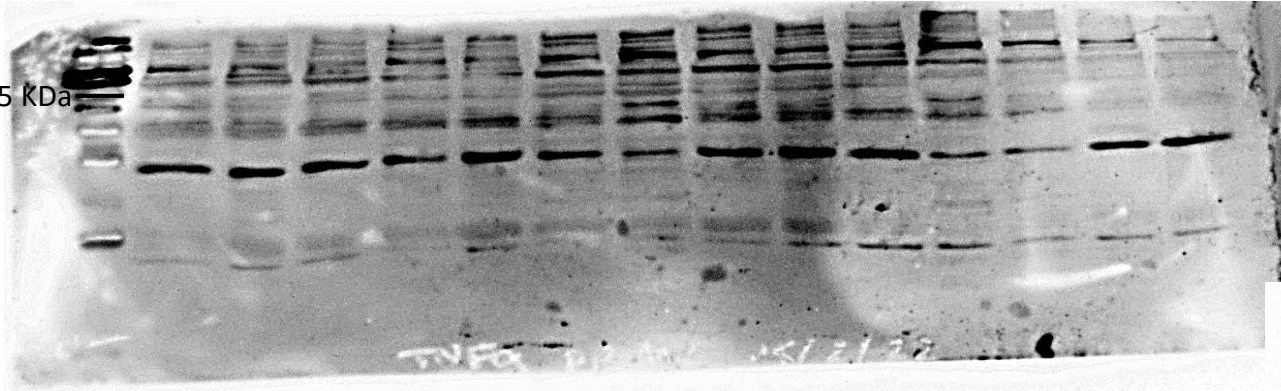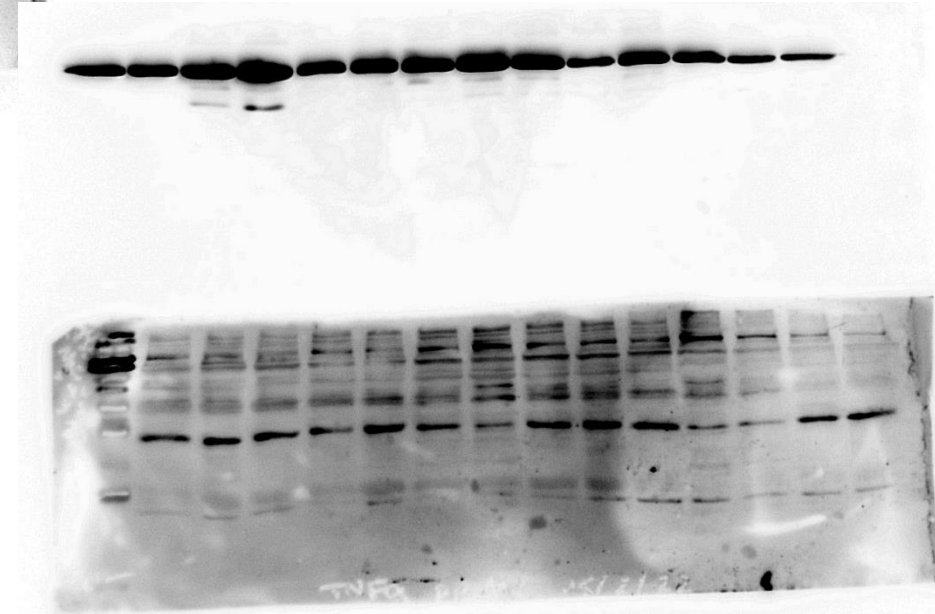

Supplement: 41598_2023_32433_MOESM2_ESM.pdf [file 41598_2023_32433_MOESM2_ESM.pdf]
