# Supplementary material for: Alpha-linolenic acid modulates systemic and adipose tissue-specific insulin sensitivity, inflammation, and the endocannabinoid system in dairy cows
Source: PubMed Central journal article supplement (PMC10066235; doi:10.1038/s41598-023-32433-7), 2023-03-31
Supplement: 41598_2023_32433_MOESM3_ESM.pdf [file 41598_2023_32433_MOESM3_ESM.pdf]

Adipose tissue

CTL

ALA

Marker 3882 3785 4001 3669 3798 3987 3728 3805 3924 3940 3991 3986 3745 3652

Actin (45 KDa)

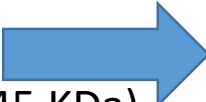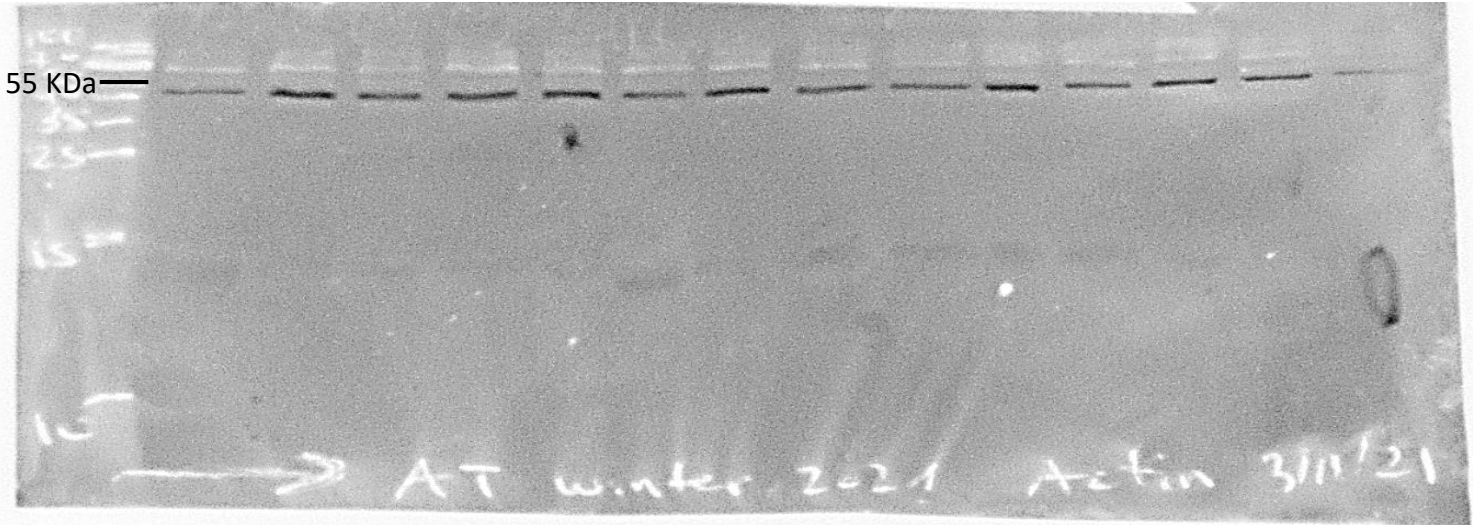

Adipose tissue

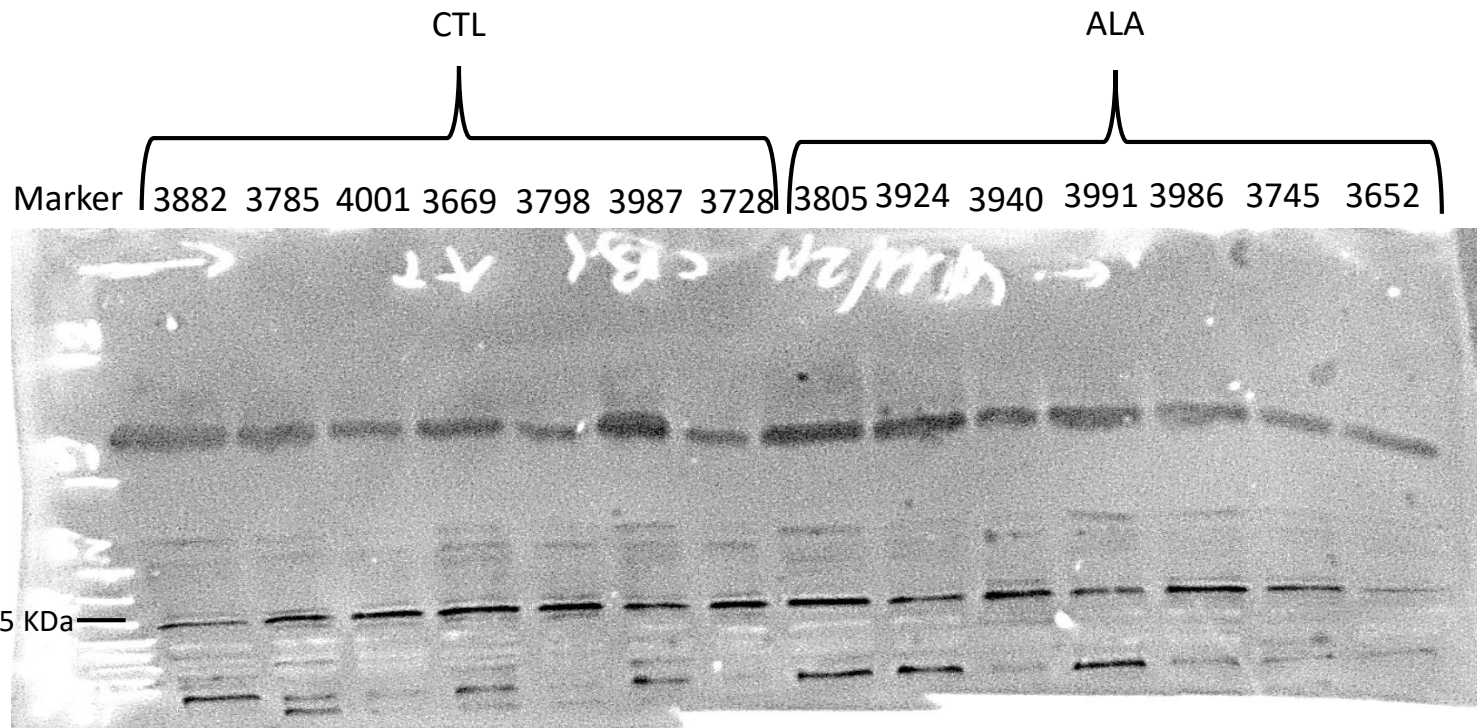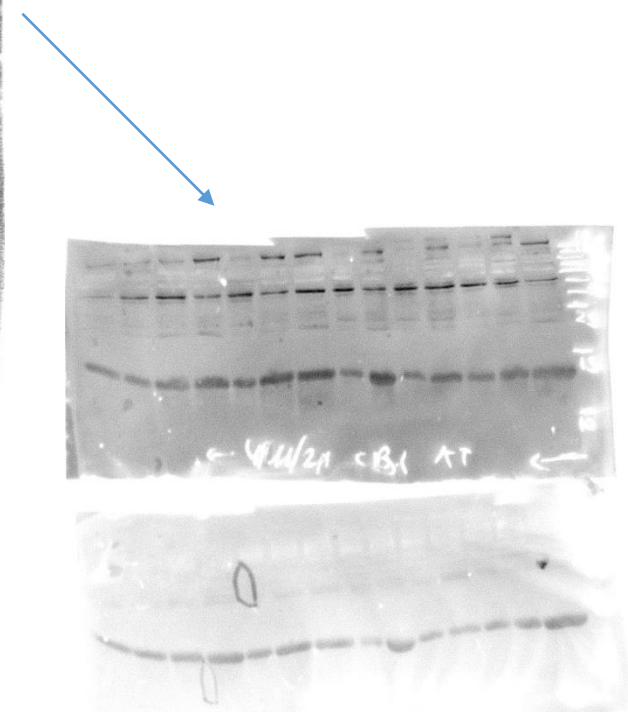

Adipose tissue

CTL ALA

Marker 3882 3785 4001 3669 3798 3987 3728 3805 3924 3940 3991 3986 3745 3652

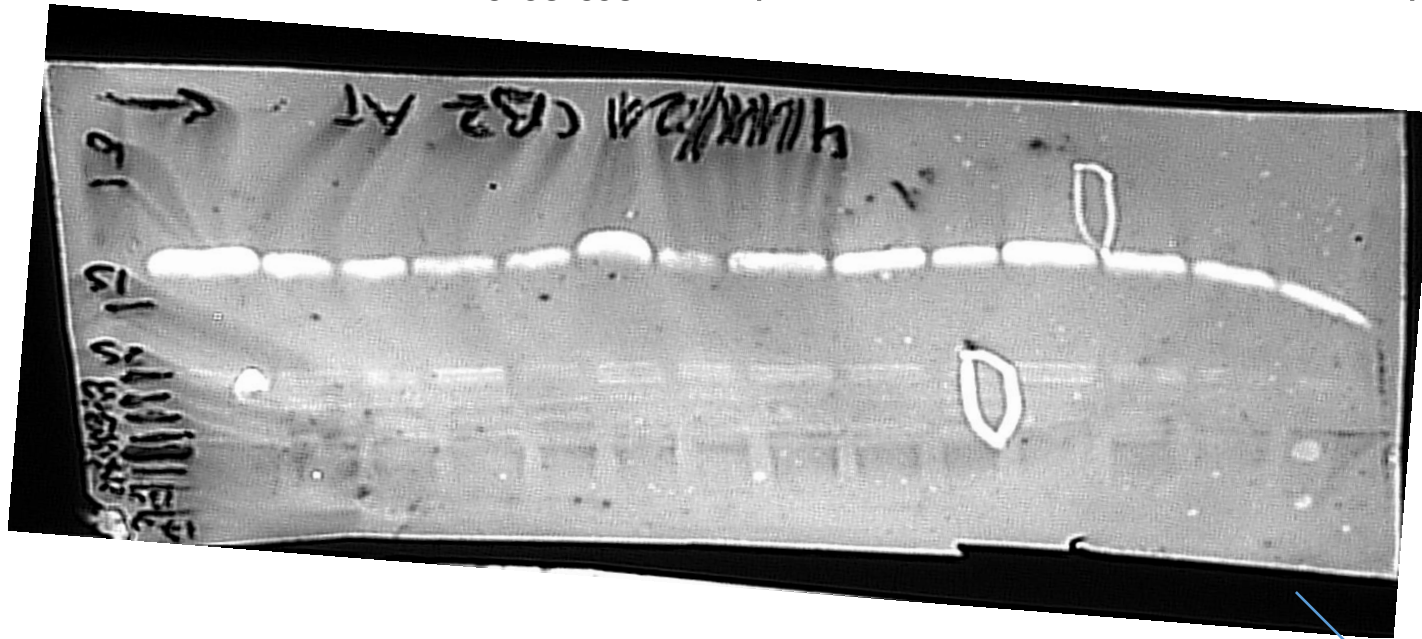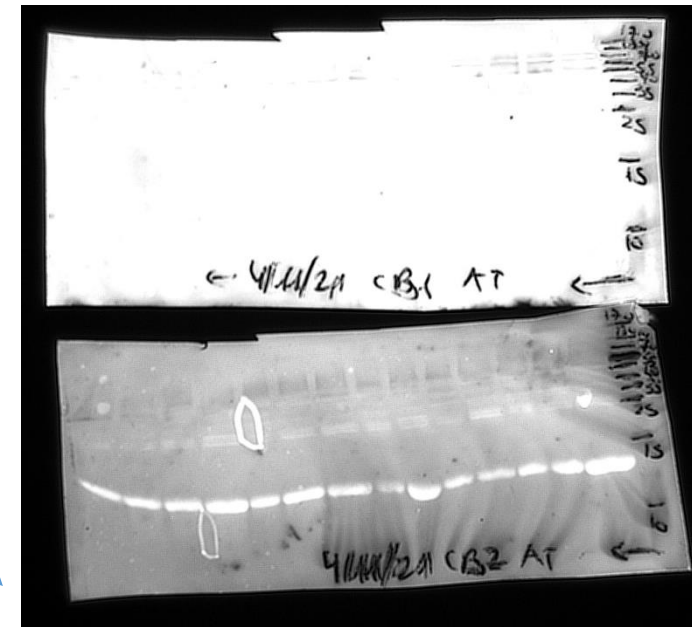

CB2 (50 KDa)

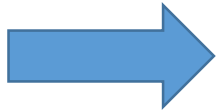

Adipose  
tissue

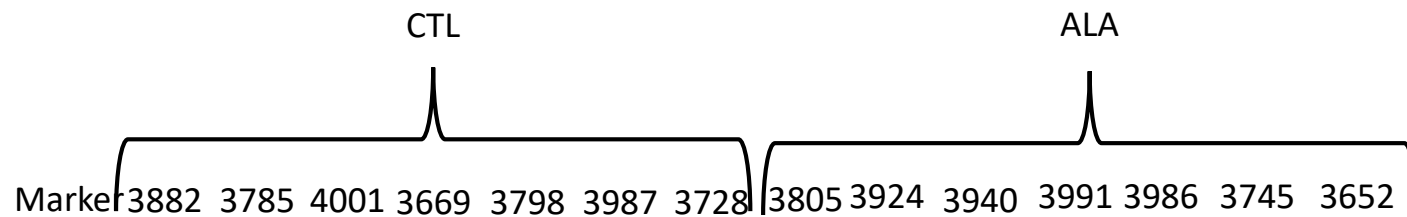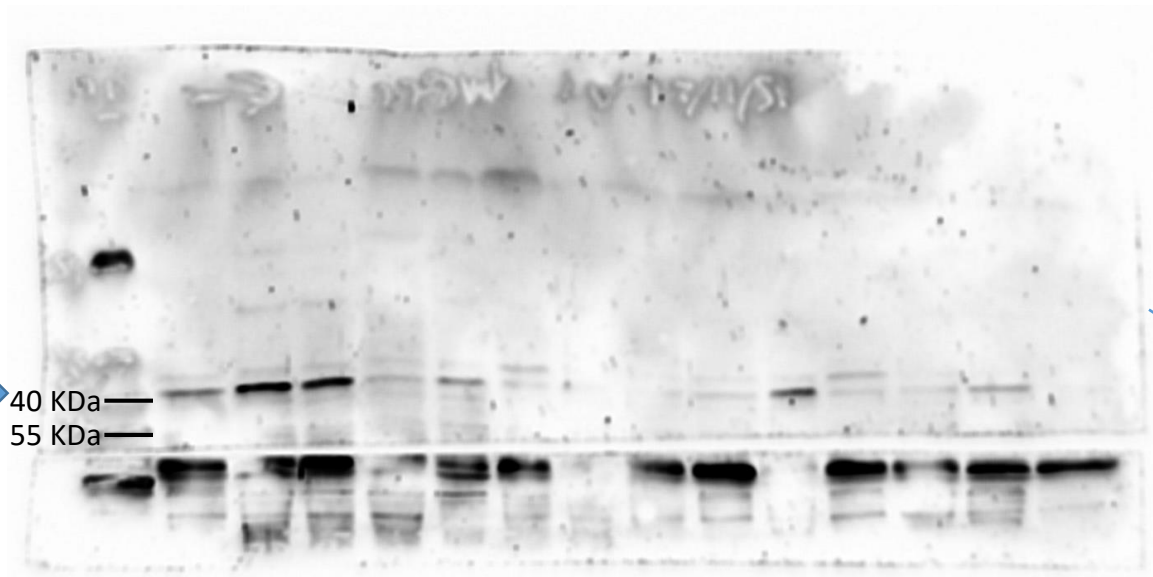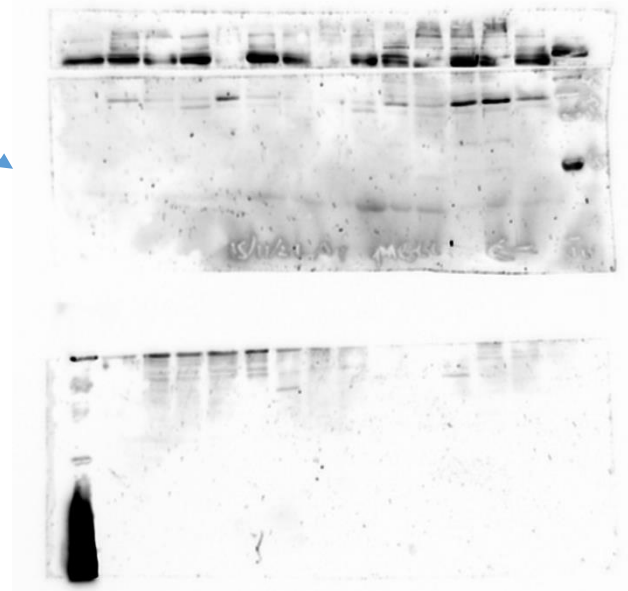





Adipose tissue

CTL

ALA

Marker 3882 3785 4001 3669 3798 3987 3728 3805 3924 3940 3991 3986 3745 3652

FAAH (43 KDa)

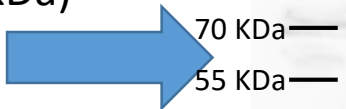

70 KDa  
55 KDa

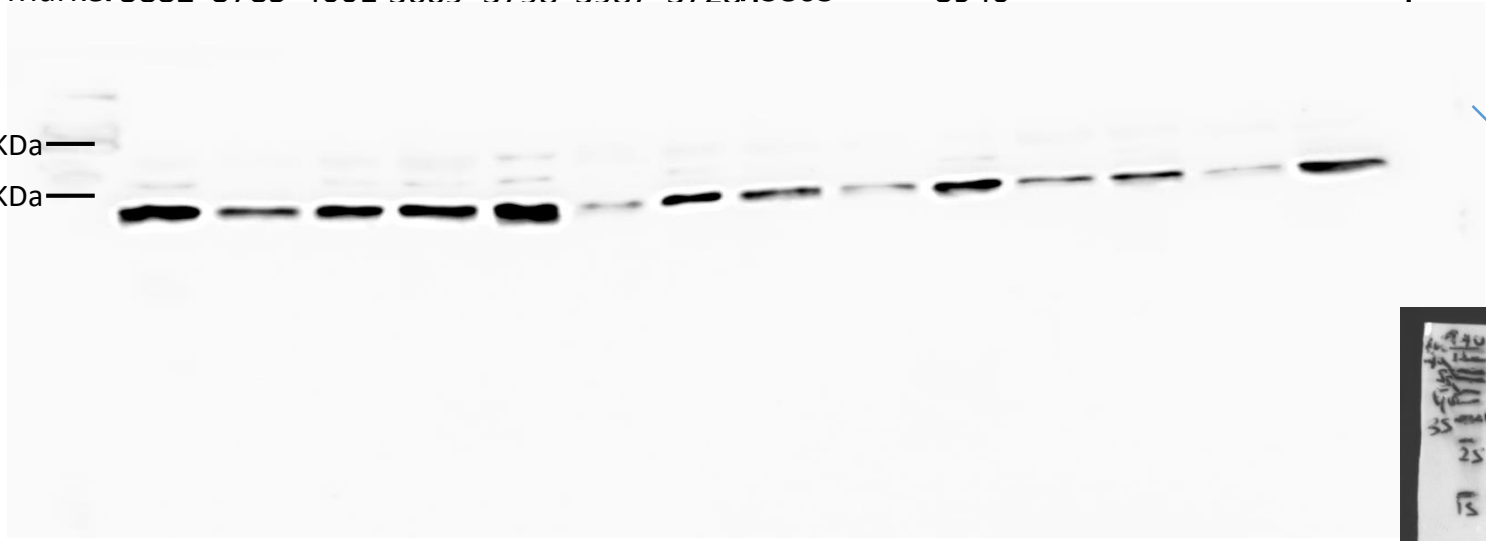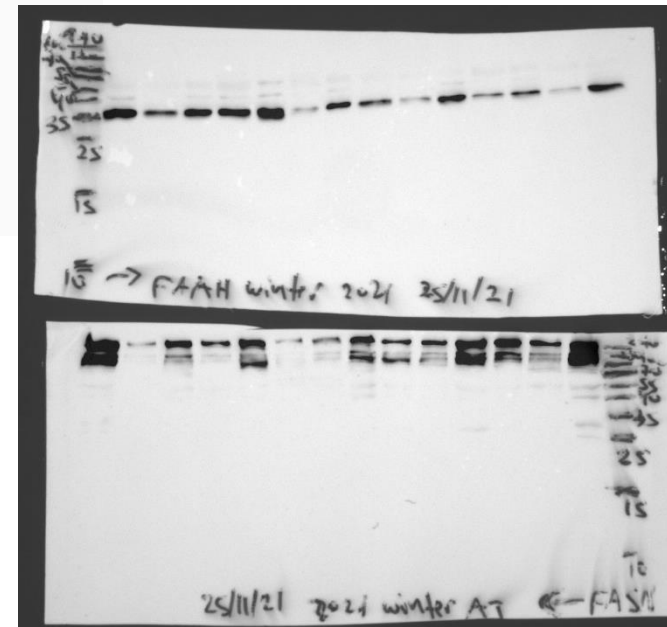

Adipose tissue

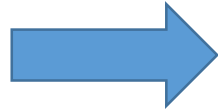

pERK (42 KDa)

CTL

ALA

Marker 3882 3785 4001 3669 3798 3987 3728 3805 3924 3940 3991 3986 3745 3652

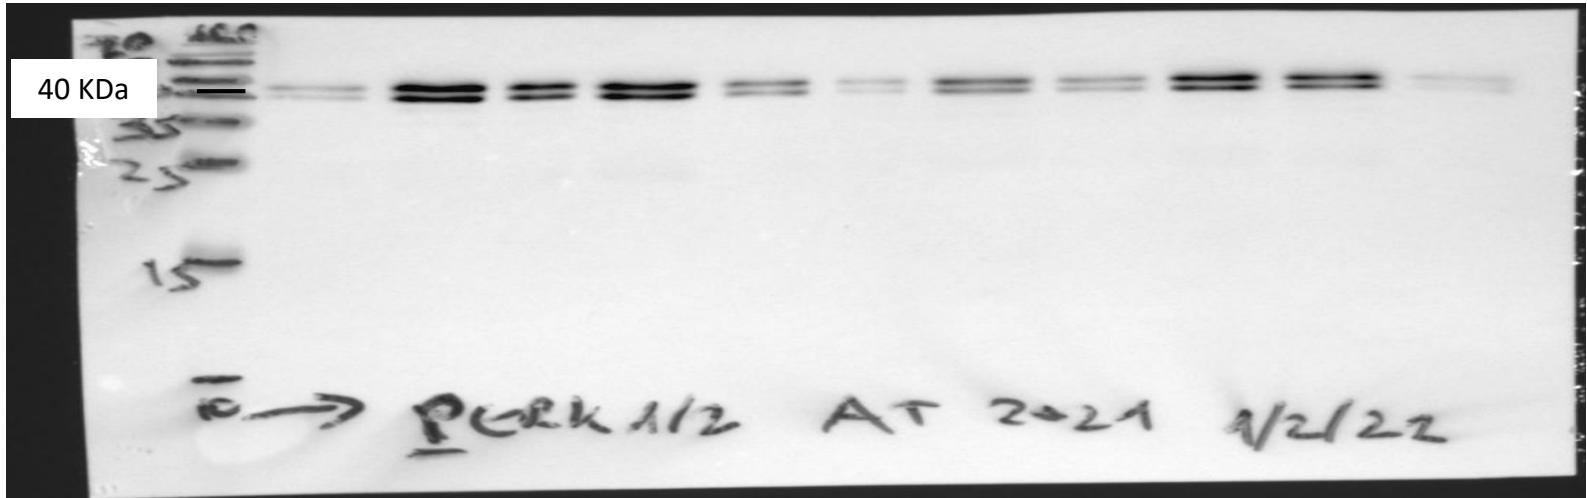

ERK (42 KDa)

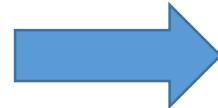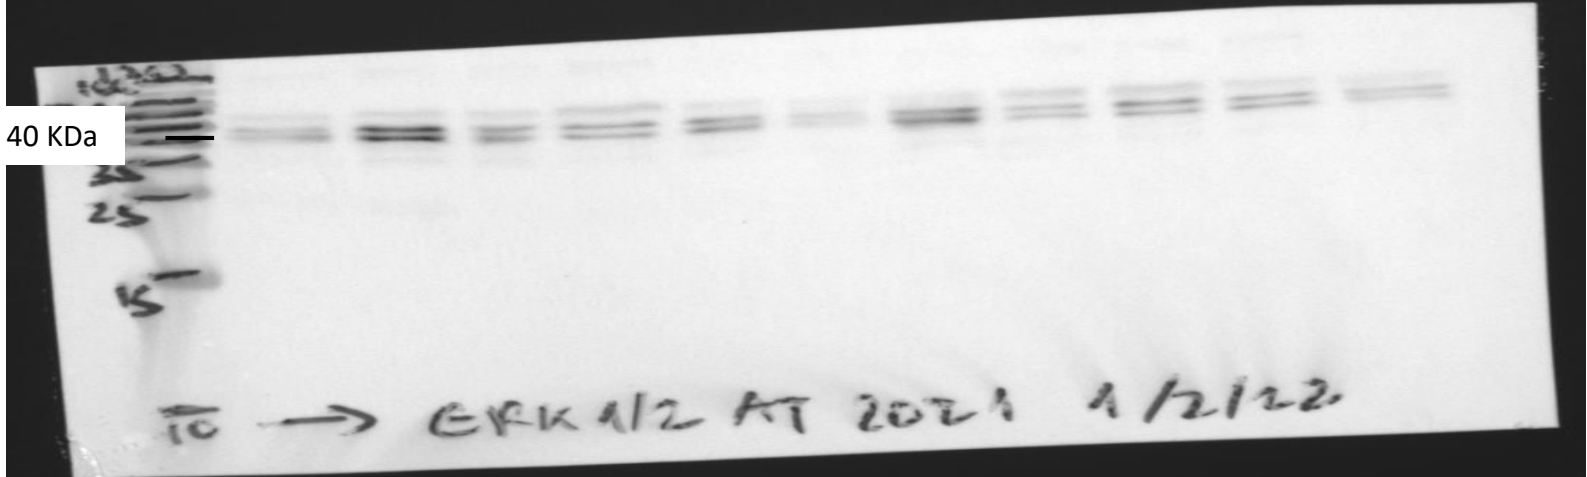

Adipose tissue

CTL  
ALA  
Marker 3882 3785 4001 3669 3798 3987 3728 3805 3924 3940 3991 3986 3745 3652

AMPK (62 KDa)

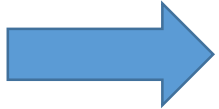

pAMPK (62 KDa)

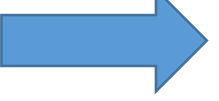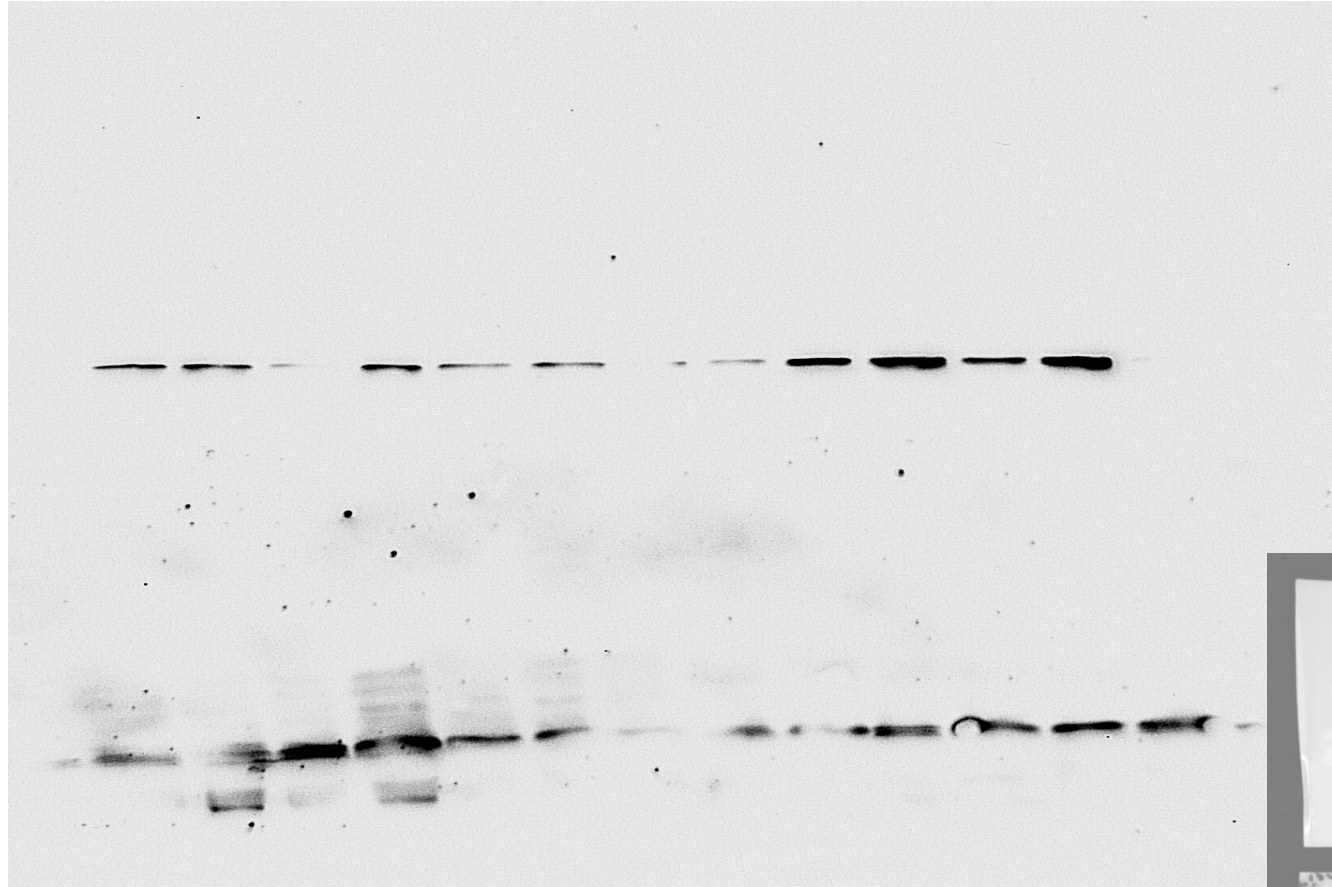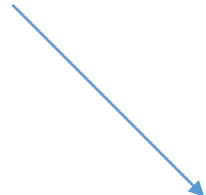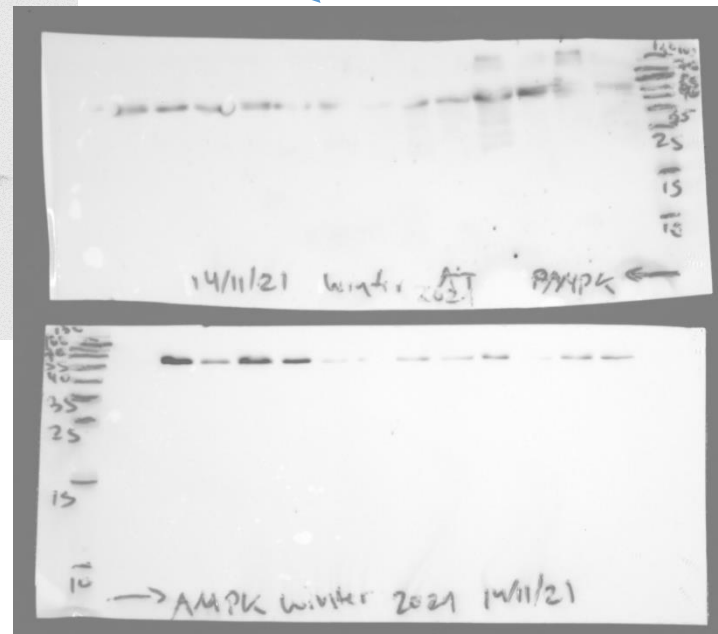



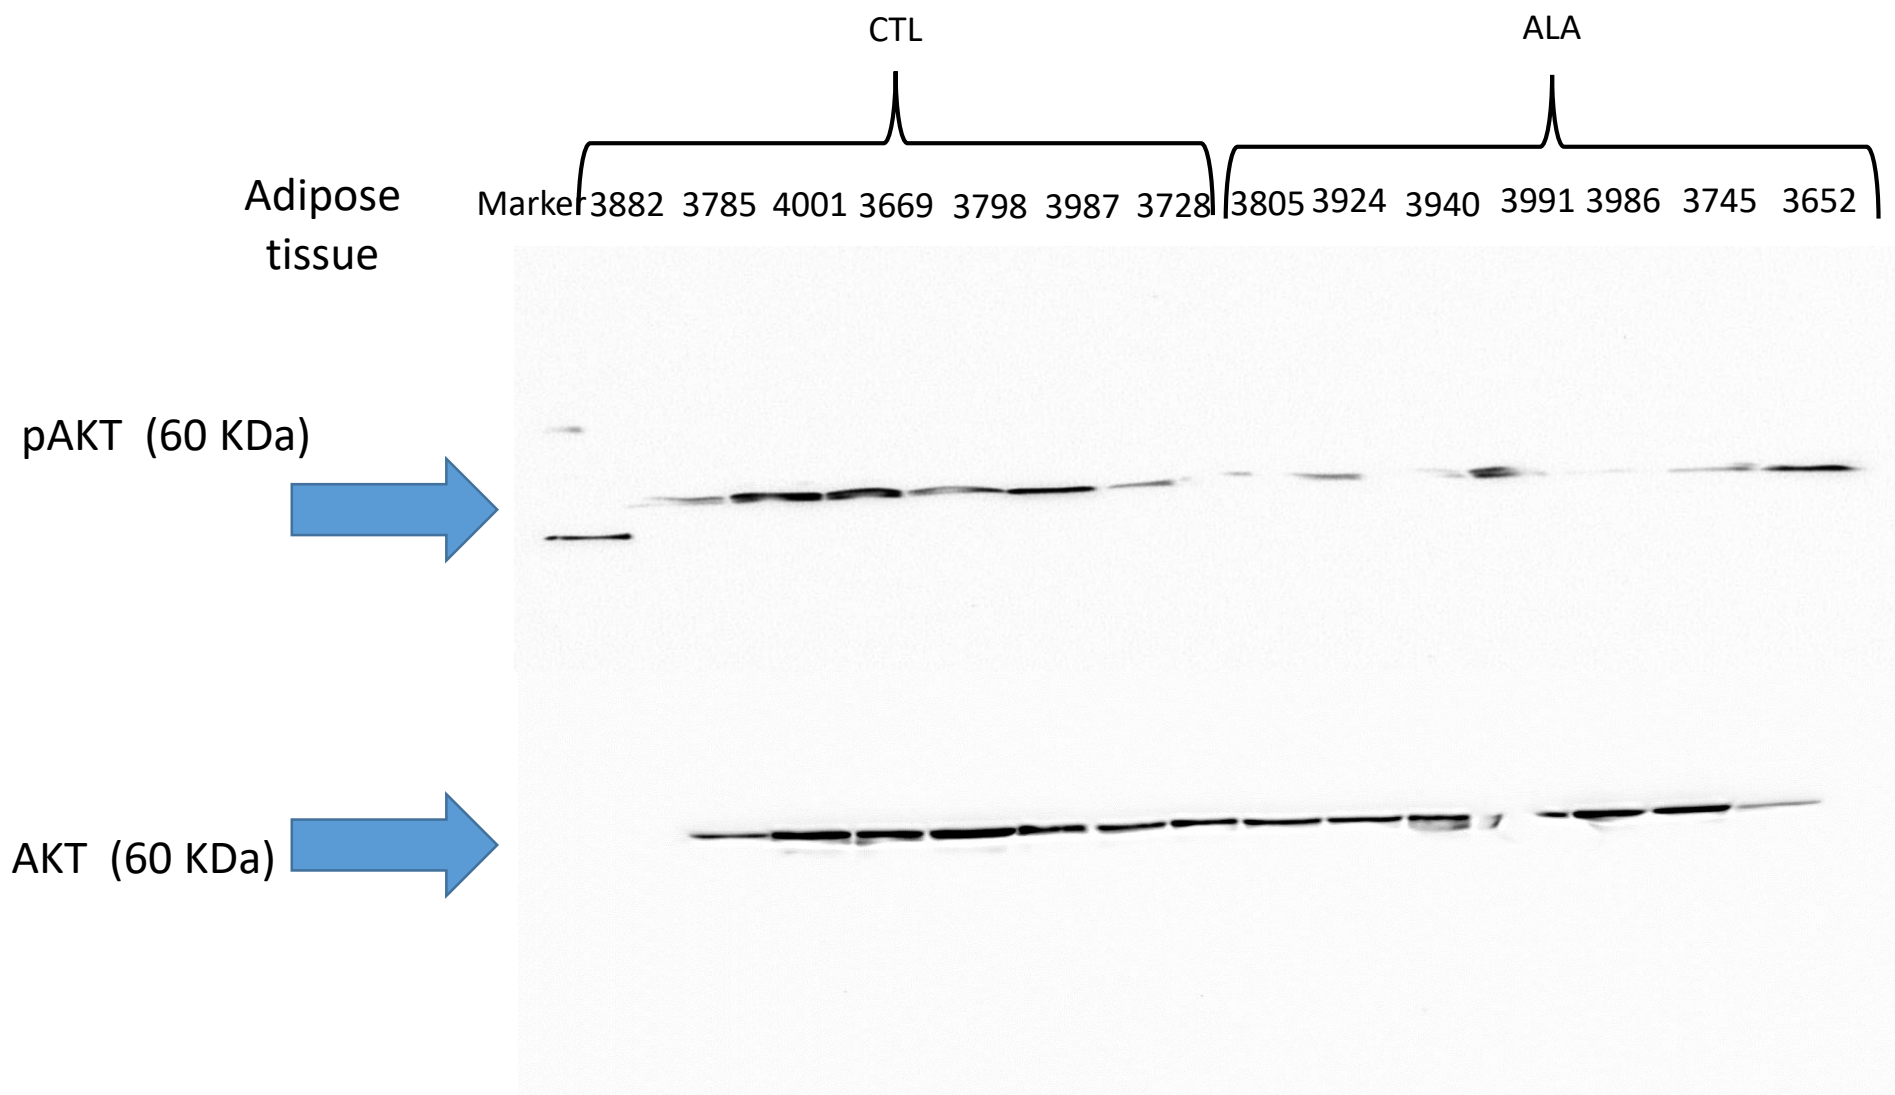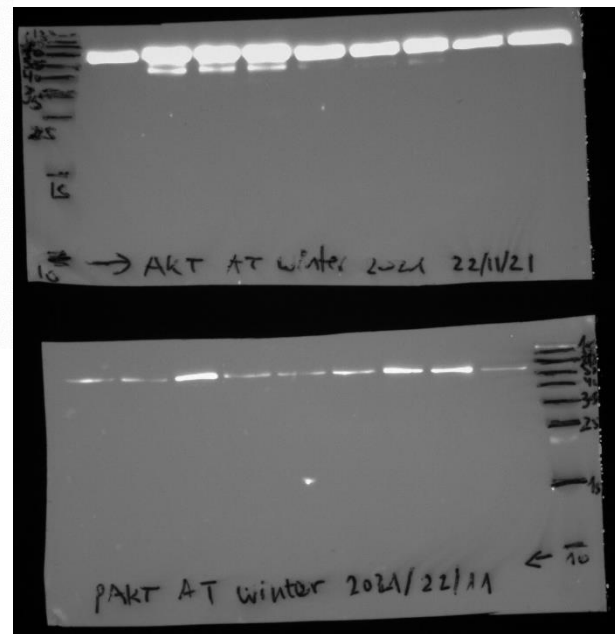

Adipose tissue

$\alpha$ -Tubulin (52KDa)

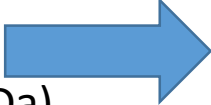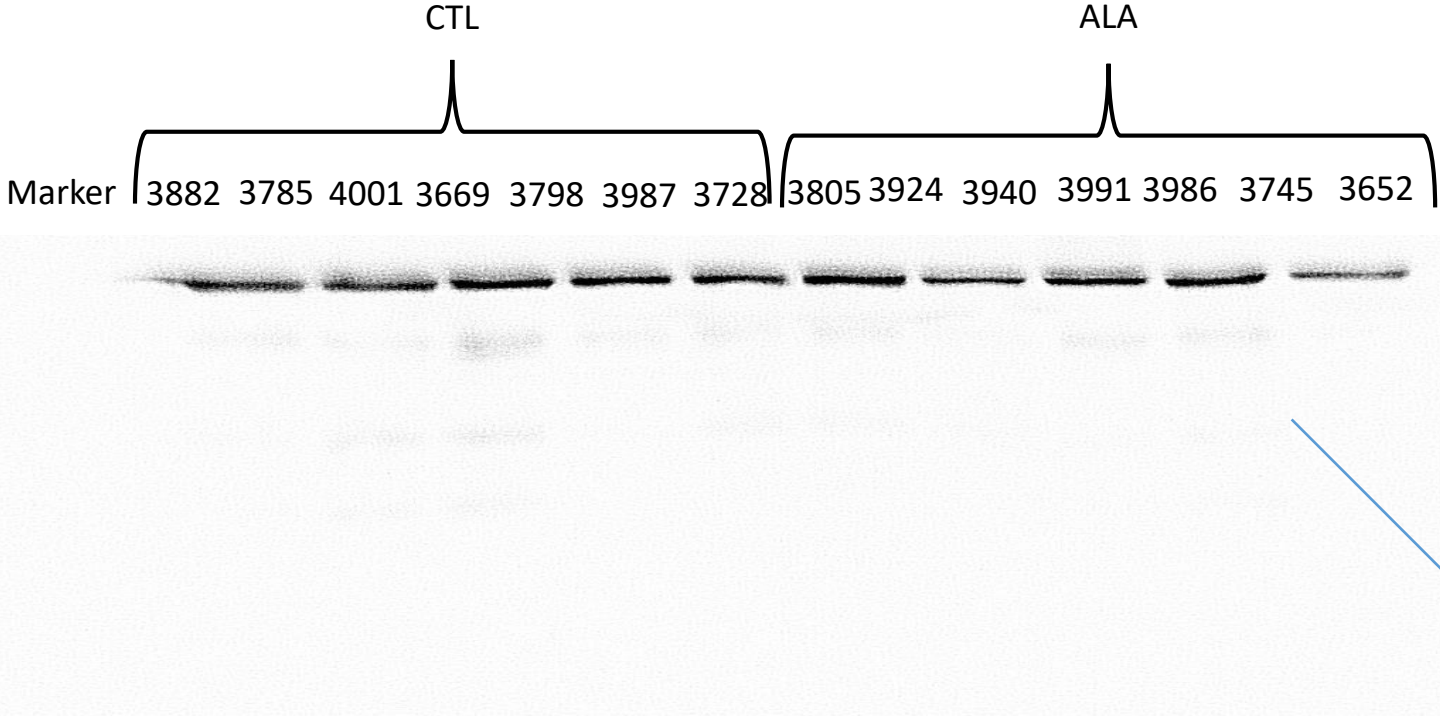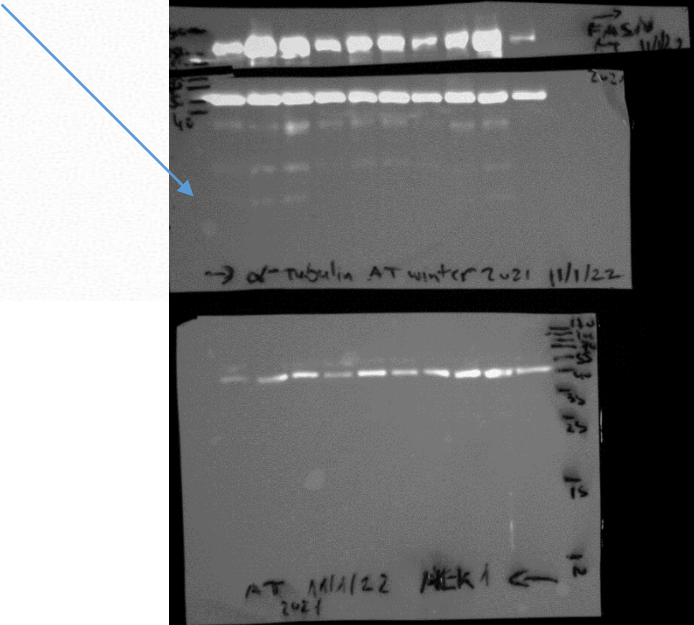

Adipose tissue

CTL

ALA

Marker 3882 3785 4001 3669 3798 3987 3728 3805 3924 3940 3991 3986 3745 3652

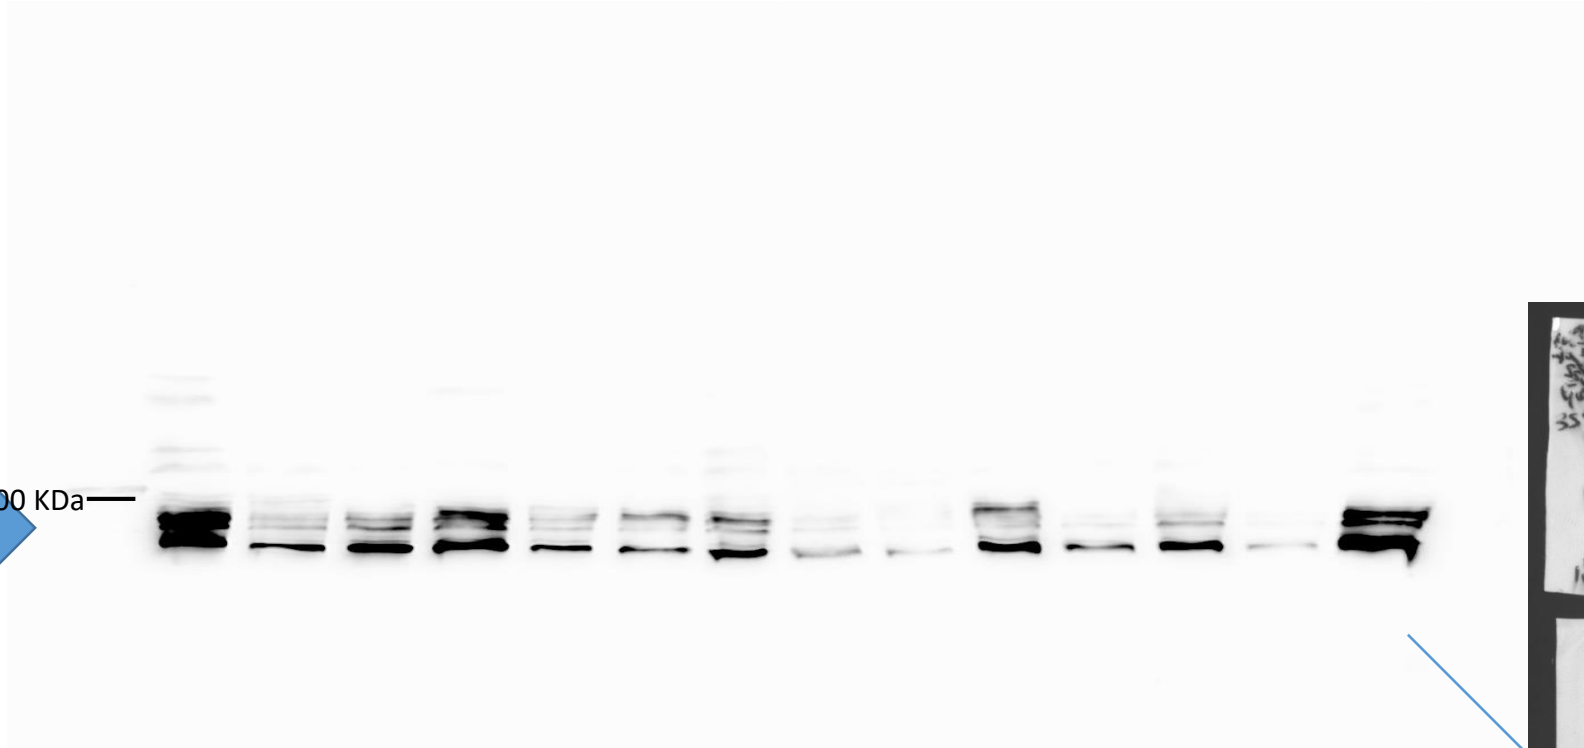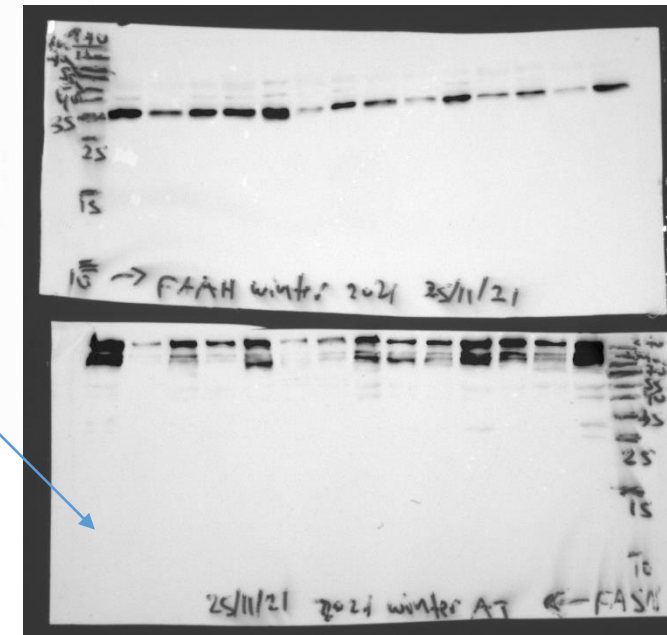

FASN (273 KDa)

100 KDa

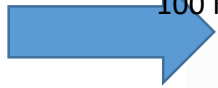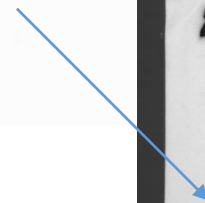

25/11/21 2021 winter AT ← FASN

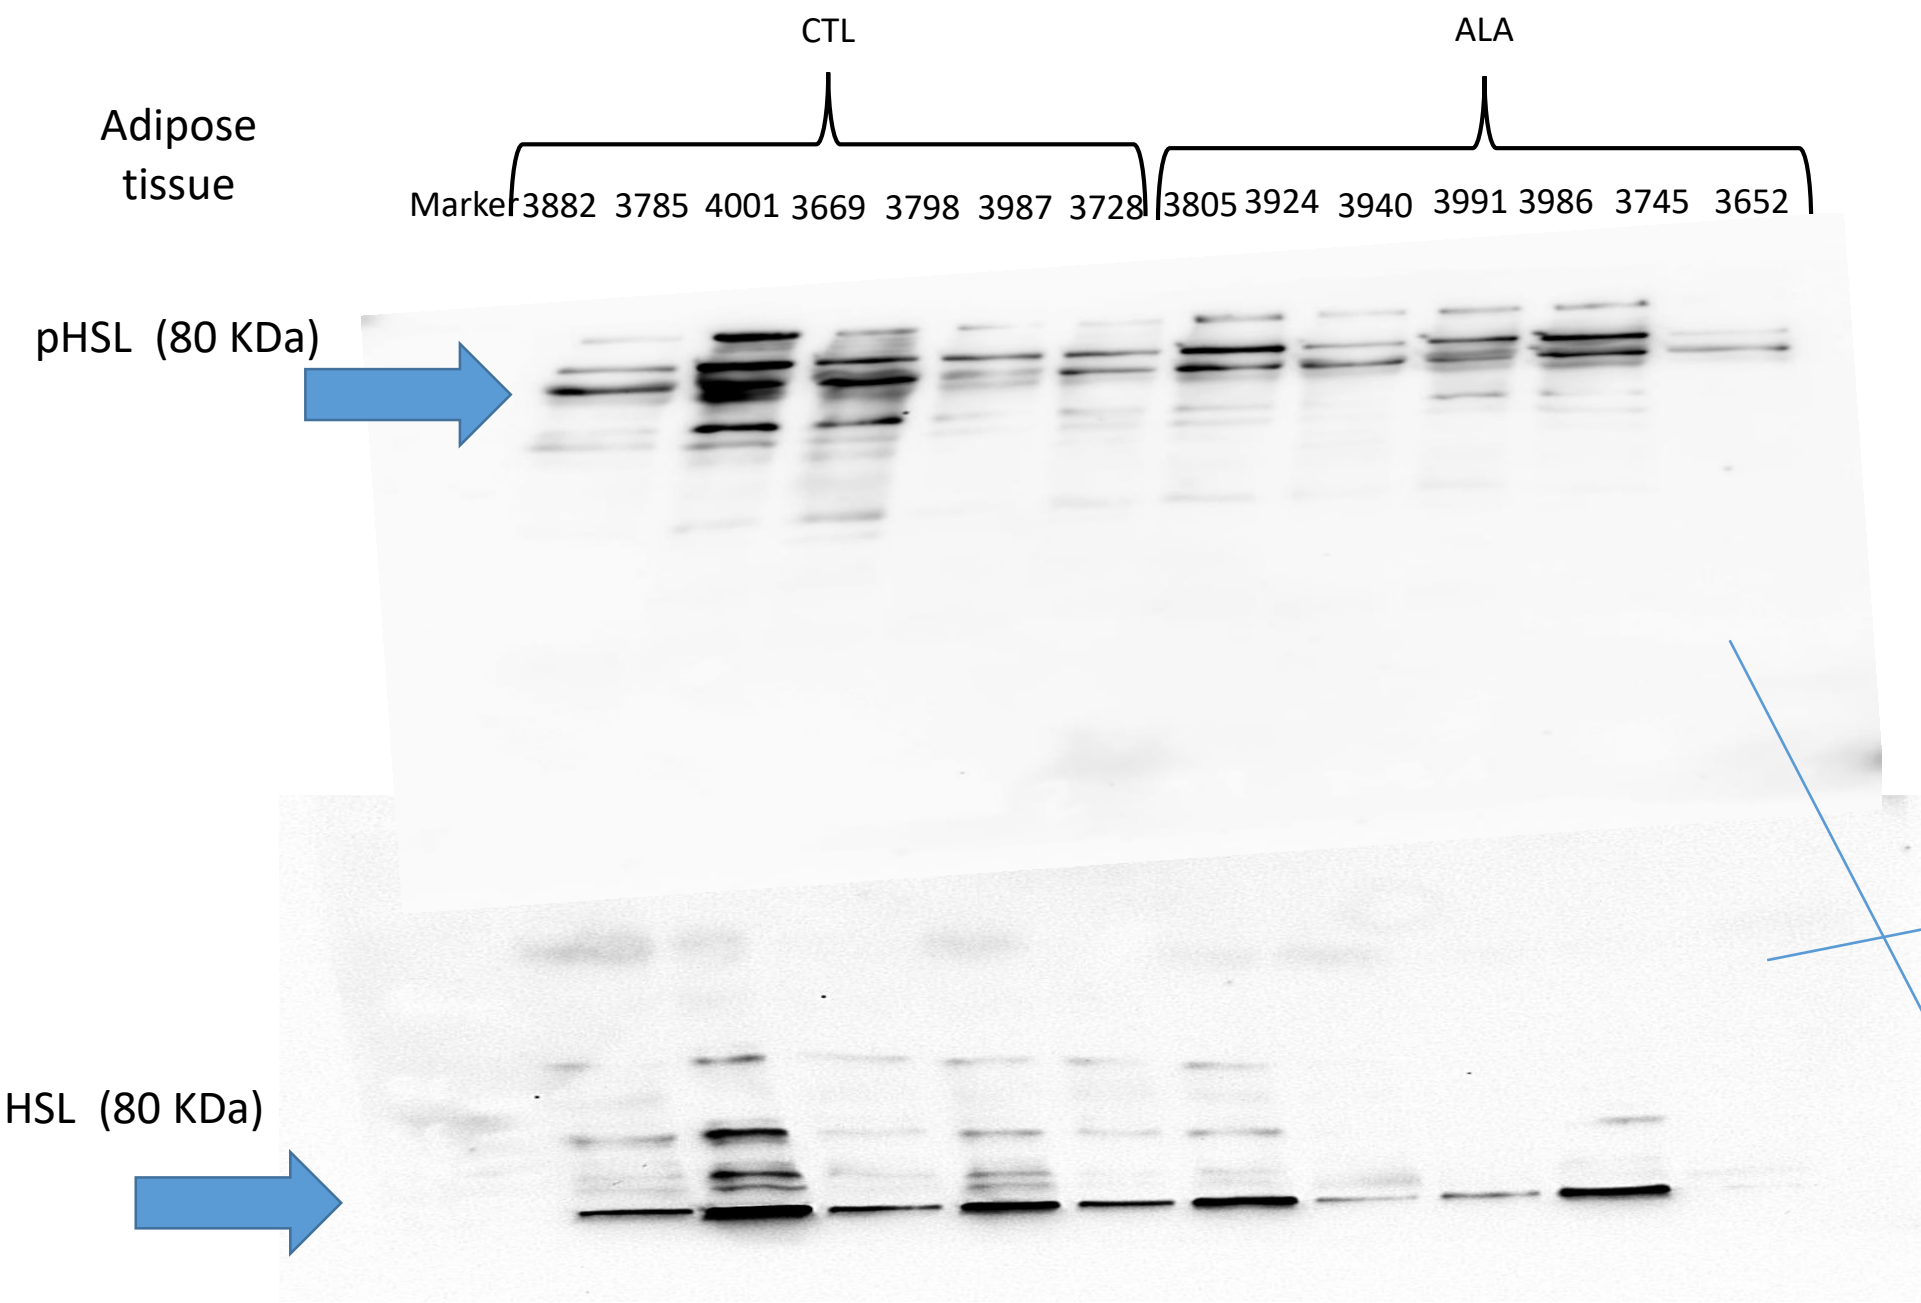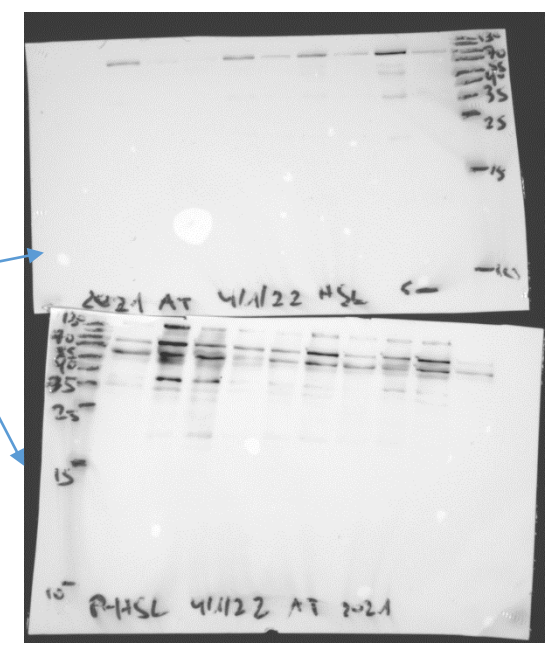



Adipose tissue

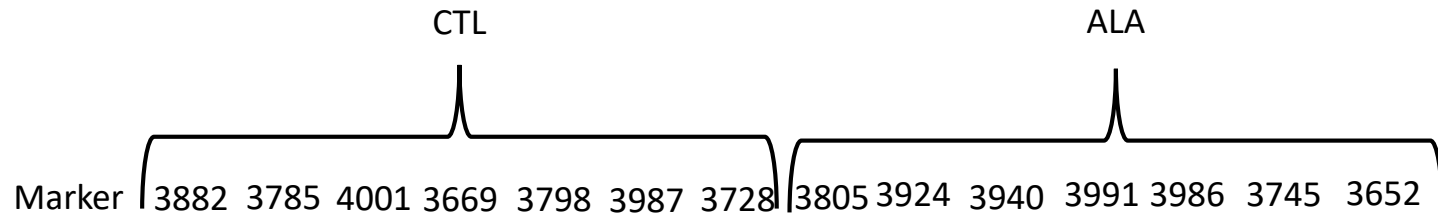

TNF-A (60 KDa)

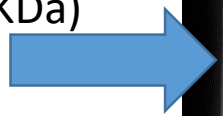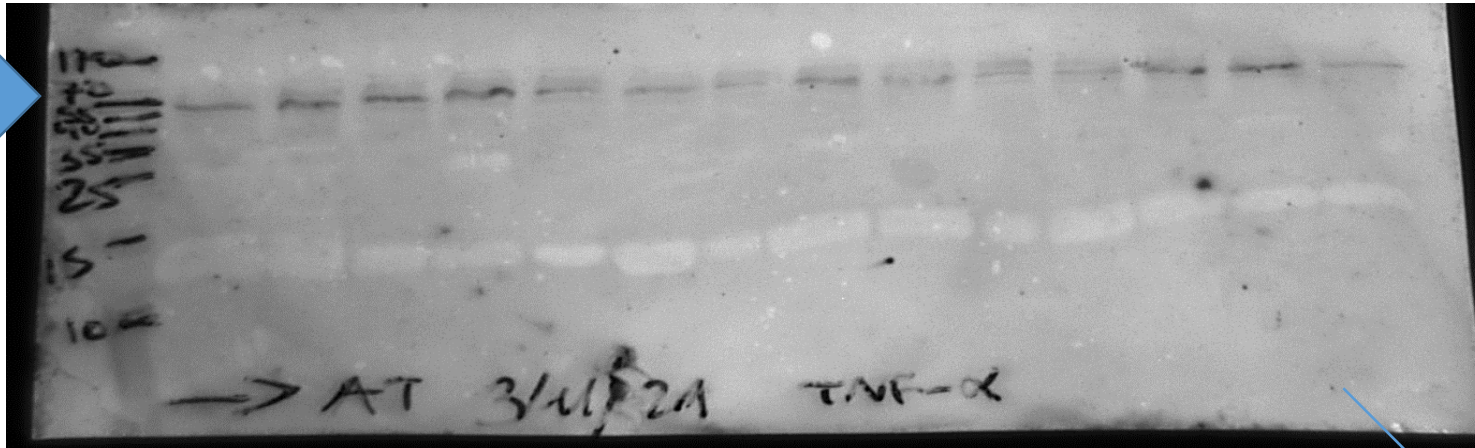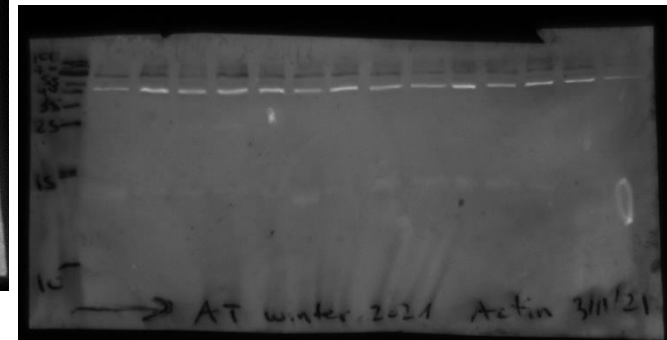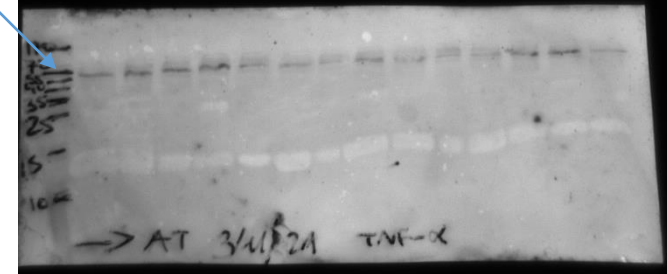

Adipose  
tissue

CTL

ALA

Marker 3882 3785 4001 3669 3798 3987 3728 | 3805 3924 3940 3991 3986 3745 3652

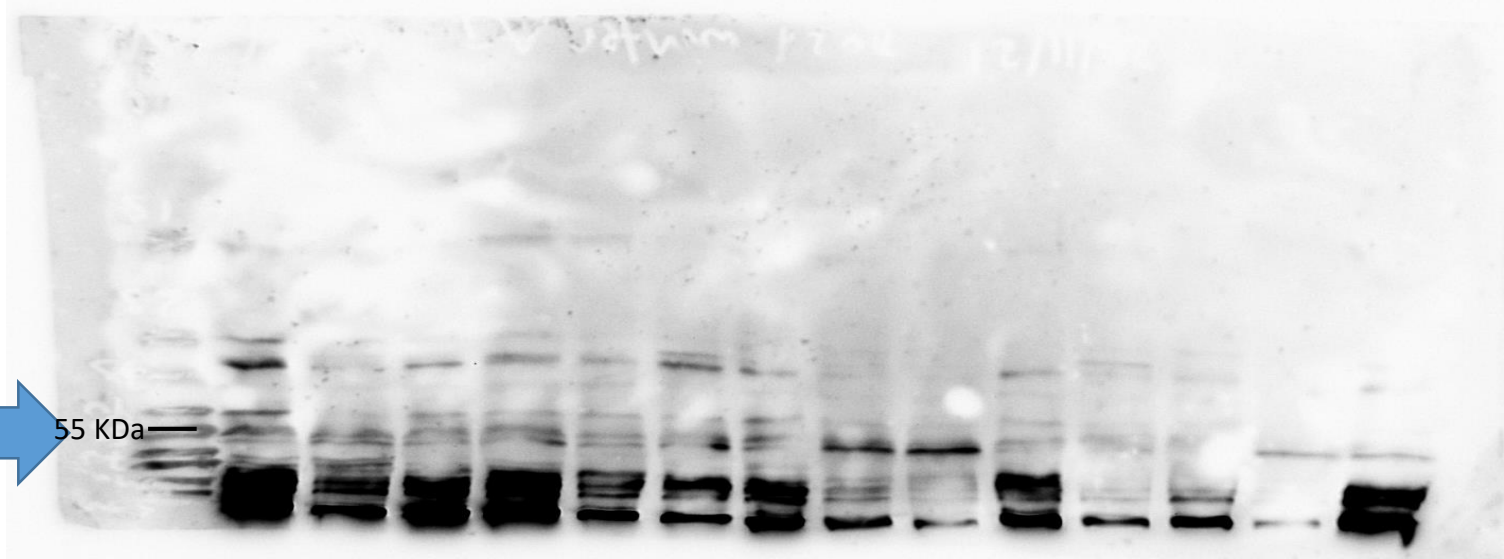

RELA (65 KDa)

55 KDa
